# Supplementary material
Source: publisher figshare collection journal article supplement (https://acs.figshare.com/ndownloader/files/3898288)
Supplement: Supplementary file 1 [file 3898288]

# Supporting Information

**Significantly Enhanced Visible-Light-Induced Photocatalytic  
Performance of Hybrid Zn-Cr Layered Double Hydroxide/Graphene  
Nanocomposite and the Mechanism Study**

*Meng Lan, Guoli Fan,\* Lan Yang, Feng Li\**

*State Key Laboratory of Chemical Resource Engineering, Beijing University of*

*Chemical Technology, P.O.BOX 98, Beijing, 100029, P.R. China*

\* To whom correspondence should be addressed.

Tel.: 8610-64451226; Fax: 8610-64425385.

E-mail: fangl@mail.buct.edu.cn (G.Fan); lifeng@mail.buct.edu.cn (F.Li)

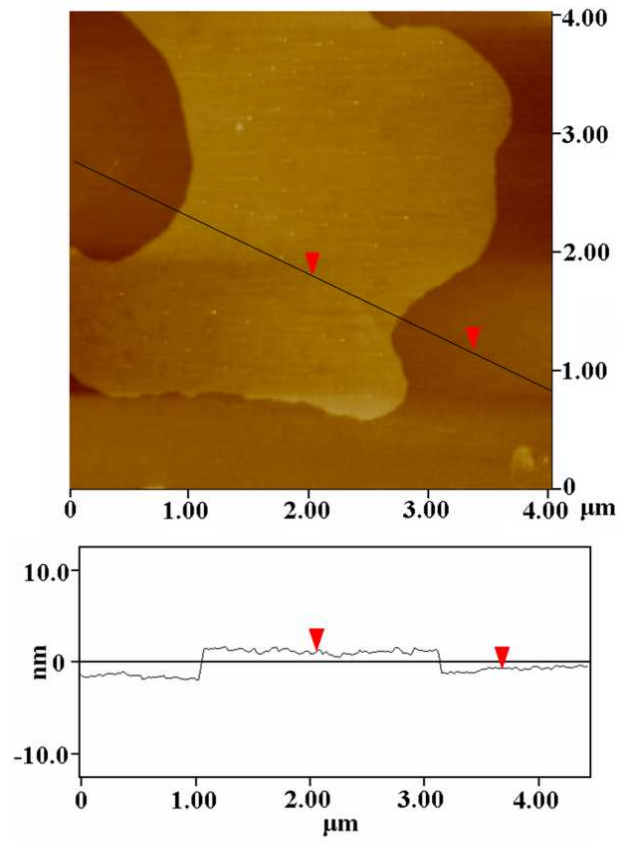

**Figure S1.** AFM image and cross-section analyses of graphene

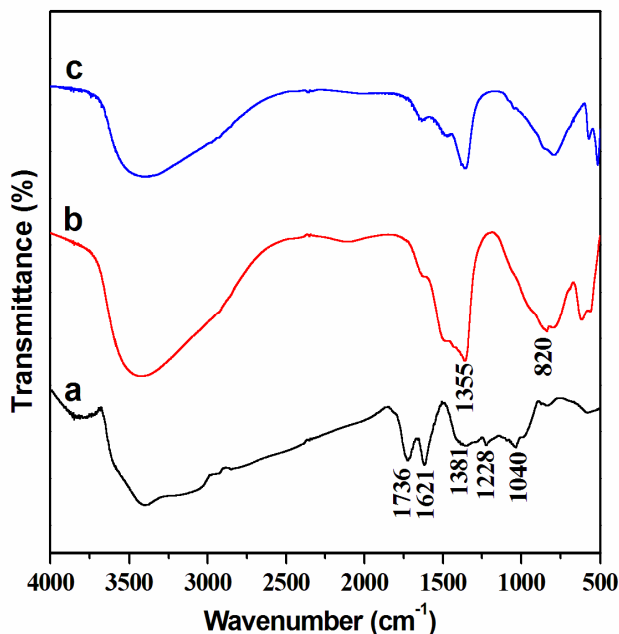

**Figure S2.** FT-IR spectra of GO (a), ZnCr-LDH (b), and LDH/G-1(c).

Figure S2 presents FT-IR spectra of GO, LDH/G-1, and pure ZnCr-LDH samples. As for GO, the absorption at  $1736\text{ cm}^{-1}$  was assigned to the C=O stretching vibration of COOH groups, while the absorption at  $1621\text{ cm}^{-1}$  was assigned to the stretching vibration of carbon backbone (C=C/C-C).<sup>1,2</sup> Three weak absorption peaks at about  $1040$ ,  $1228$  and  $1381\text{ cm}^{-1}$  were interpreted as the epoxy (C-O-C), alkoxy (C-O), and carboxyl (C-OH) stretching vibrations, respectively. And, the broad absorption between  $3650$  and  $3250\text{ cm}^{-1}$  was associated with the stretching vibration of hydroxyl groups coming from COOH groups and water molecules. However, as for LDH/G-1, above characteristic absorption bands related to C=O and C-O stretching vibrations all disappeared. At the same time, two intense absorption peaks at about  $820$  and  $1355\text{ cm}^{-1}$  were observed, which is assigned to the  $\nu_2$  (out-of plane deformation) and  $\nu_3$  (symmetric stretching) vibrations of interlayer carbonate anions;<sup>3</sup> the bands appearing at the low-frequency region were attributed to the metal-oxygen and metal-hydroxyl vibration modes in the lattice of ZnCr-LDH. The above results suggested the reduction of GO in the LDH/G-1 composite.

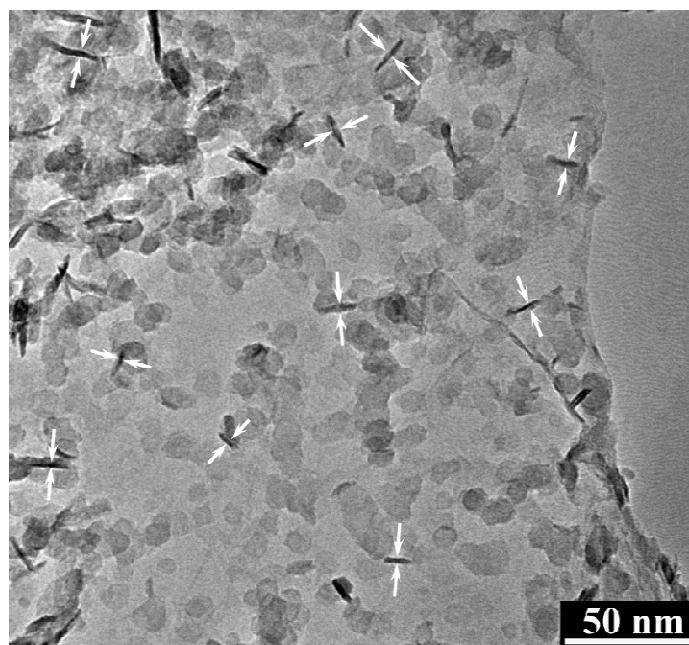

**Figure S3.** TEM image of LDH/G-1

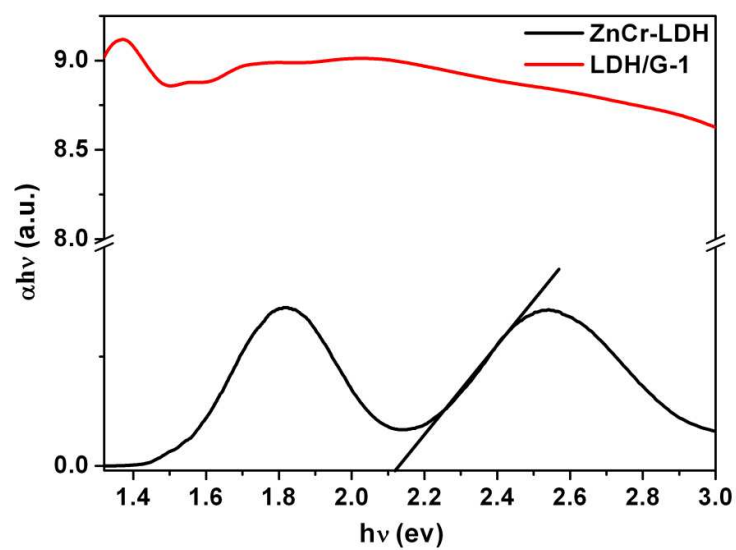

**Figure S4.** Specific absorption band edges calculated from UV-vis diffuse reflectance spectra.

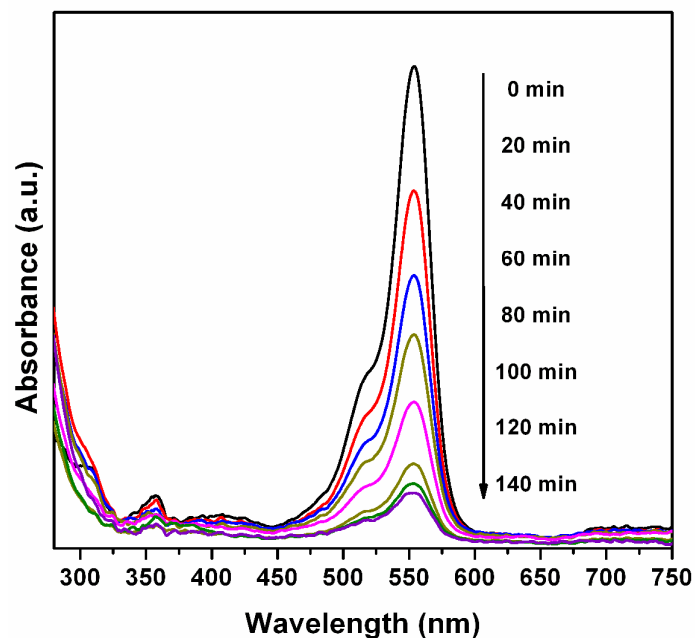

**Figure S5.** Absorption changes of RhB solution during the photo-degradation process over the LDH/G-1 sample under visible light irradiation.

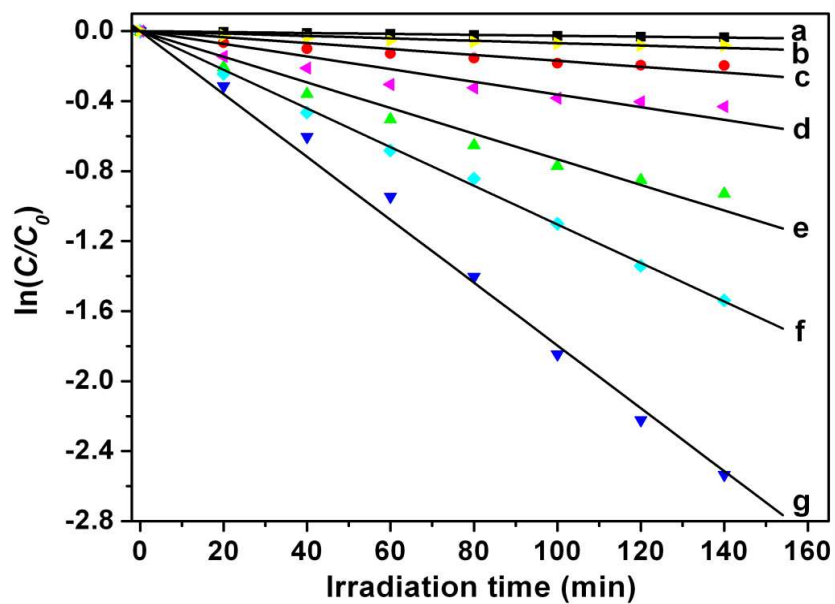

**Figure S6.** Pseudo-first-order kinetic for the photo-degradation of RhB for different samples under visible light irradiation: (a) blank, (b) graphene, (c) ZnCr-LDH, (d) standard Degussa P25, (e) LDH/G-0.5, (f) LDH/G-2, and (g) LDH/G-1.

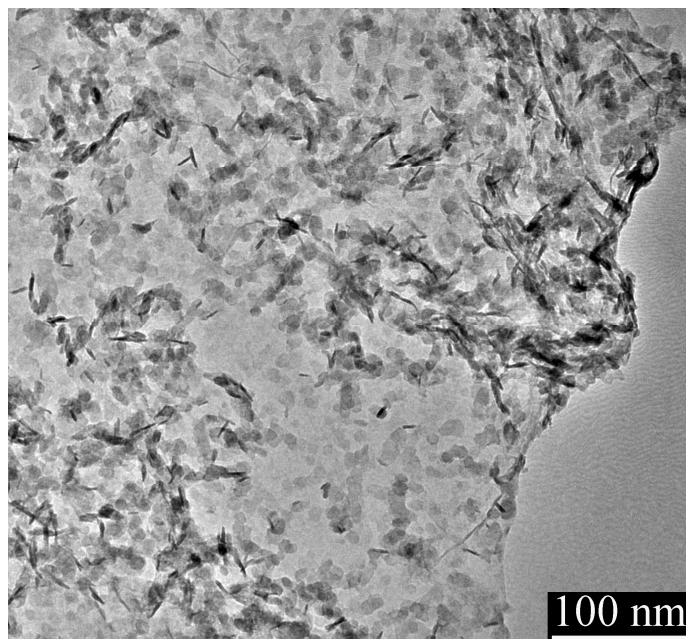

**Figure S7.** Typical TEM image of LDH/G-1 after recycling for five times.

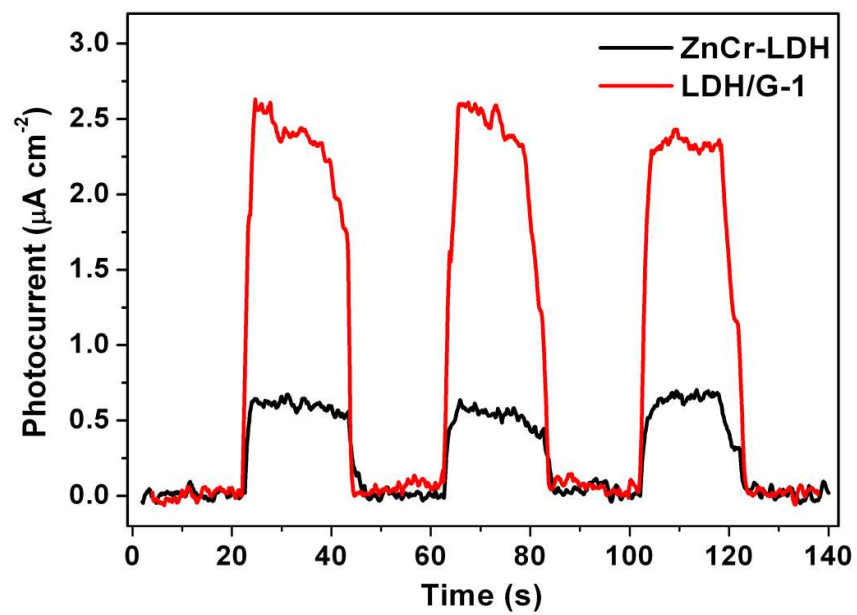

**Figure S8.** Transient photocurrent responses for ZnCr-LDH and LDH/G-1 samples.

## References

- (1) Nethravathi, C.; Nisha, T.; Ravishankar, N.; Shivakumara, C.; Rajamathi, M. Graphene-Nanocrystalline Metal Sulphide Composites Produced by a One-Pot Reaction Starting from Graphite Oxide. *Carbon* **2009**, *47*, 2054–2059.
- (2) Bourlinos, A. B.; Gournis, D.; Petridis, D.; Szabo, T.; Szeri, A.; Dekany, I. Graphite Oxide: Chemical Reduction to Graphite and Surface Modification with Primary Aliphatic Amines and Amino Acids. *Langmuir* **2003**, *19*, 6050–6055.
- (3) Perera, S. D.; Mariano, R. G.; Vu, K.; Nour, N.; Seitz, O.; Chabal, Y.; Balkus, Jr. K. J. Hydrothermal Synthesis of Graphene-TiO<sub>2</sub> Nanotube Composites with Enhanced Photocatalytic Activity. *ACS Catal.* **2012**, *2*, 949–956.
